# Supplementary material for: Control of cyclic oligoadenylate synthesis in a type III CRISPR system
Source: eLife. 2018 Jul 2;7:e36734. doi: 10.7554/eLife.36734 (PMC6053304; doi:10.7554/eLife.36734)
Supplement: Figure 4—source data 1. [file elife-36734-fig4-data1.xlsx]

## Sheet: Sheet1
Figure 4B source data - cOA production					RNA cleavage data
Time (min)	pixel density	cOA4 / min	norm cOA4 /min		fraction transcript cleaved
0	103				0.089552
1	556	453	0.67111		0.21973
2	1231	675	1		0.35211
5	2818	529	0.7837		0.55665
10	5355	507.4	0.7517		0.72222
20	8551	319.6	0.47348		0.86395
40	9934	69.15	0.10244		0.92174
60	10225	14.55	0.021556		0.92941
90	10903	22.6	0.033481		0.92537
120	10980	2.5667	0.0038025		0.93103
