# Supplementary material for: Control of cyclic oligoadenylate synthesis in a type III CRISPR system
Source: eLife. 2018 Jul 2;7:e36734. doi: 10.7554/eLife.36734 (PMC6053304; doi:10.7554/eLife.36734)
Supplement: Figure 6—source data 1. [file elife-36734-fig6-data1.xlsx]

## Sheet: Sheet1
Source data for Figure 6 - backbone cleavage rates
Time	B1-1	B1-2	B1-3	B1-4	B1-1 norm	B1-2 norm	B1-3 norm	B1-4 norm	average	stdev
replicate 1
0	4	2	3	4	0.0118694	0.00952381	0.0165746	0.0223464	0.0150786	0.00566312
2	63	53	31	41	0.186944	0.252381	0.171271	0.22905	0.209911	0.0373746
5	204	126	94	100	0.605341	0.6	0.519337	0.558659	0.570834	0.0401728
10	261	179	141	163	0.774481	0.852381	0.779006	0.910615	0.82912	0.0650111
20	326	210	181	179	0.967359	1	1	1	0.99184	0.0163205
40	337	168	165	182	1	0.8	0.911602	1.01676	0.93209	0.099412
60	288	192	162	140	0.854599	0.914286	0.895028	0.782123	0.861509	0.0584773
90	287	185	172	150	0.851632	0.880952	0.950276	0.837989	0.880212	0.0500305
replicate 2
0	11	4	7	10	0.0210728	0.0186047	0.0255474	0.0389105	0.0260338	0.00905262
2	38	24	25	34	0.0727969	0.111628	0.0912409	0.132296	0.10199	0.0256847
5	136	65	77	79	0.260536	0.302326	0.281022	0.307393	0.287819	0.0214796
10	219	116	139	147	0.41954	0.539535	0.507299	0.571984	0.50959	0.0655845
20	347	196	229	230	0.664751	0.911628	0.835766	0.894942	0.826772	0.112812
40	522	215	254	257	1	1	0.927007	1	0.981752	0.0364964
60	366	210	270	213	0.701149	0.976744	0.985401	0.828794	0.873022	0.135257
90	382	203	274	218	0.731801	0.944186	1	0.848249	0.881059	0.117596
replicate 3
0	0	0	0	1
2	4	1	1	2	0.0148699	0.0149254	0.00757576	0.0229885	0.0150899	0.00629618
5	12	3	5	6	0.0446097	0.0447761	0.0378788	0.0689655	0.0490575	0.0136554
10	33	8	11	11	0.122677	0.119403	0.0833333	0.126437	0.112962	0.0199607
20	69	16	29	24	0.256506	0.238806	0.219697	0.275862	0.247718	0.024041
40	145	29	55	49	0.539033	0.432836	0.416667	0.563218	0.487939	0.0739228
60	186	48	85	58	0.69145	0.716418	0.643939	0.666667	0.679618	0.0312779
90	269	67	132	87	1	1	1	1	1	0
