# Supplementary material for: Control of cyclic oligoadenylate synthesis in a type III CRISPR system
Source: eLife. 2018 Jul 2;7:e36734. doi: 10.7554/eLife.36734 (PMC6053304; doi:10.7554/eLife.36734)
Supplement: Figure 7—source data 1. [file elife-36734-fig7-data1.xlsx]

## Sheet: Sheet1
Source data for Figure 7
Time	cOA4-1	cOA4/min	cOA4-2	cOA4/min	cOA4-3	cOA4/min	mean	stdev
0	4		6		23
2	154	75	119	56.5	256	116.5	82.6667	30.7259
5	1038	294.667	1129	336.667	1679	474.333	368.556	93.9825
10	2647	321.8	3235	421.2	4054	475	406	77.7228
20	4539	189.2	6139	290.4	6761	270.7	250.1	53.6529
40	6499	98	8253	105.7	9595	141.7	115.133	23.3273
60	7407	45.4	10750	124.85	11202	80.35	83.5333	39.8205
90	8143	24.5333	12767	67.2333	13057	61.8333	51.2	23.2513
120	8924	26.0333	10883	0	13198	4.7	10.2444	13.874
