# Supplementary material for: Control of cyclic oligoadenylate synthesis in a type III CRISPR system
Source: eLife. 2018 Jul 2;7:e36734. doi: 10.7554/eLife.36734 (PMC6053304; doi:10.7554/eLife.36734)
Supplement: Figure 8—source data 1. [file elife-36734-fig8-data1.xlsx]

## Sheet: Sheet1
Figure 8 source data 1
time	raw counts			normalised counts			unmod oligo
	unmod1	unmod2	unmod3	unmod1	unmod2	unmod3	mean	stdev
0	0	6	7	0	0.00365408	0.00411281	0.00258896	0.00225381
5	59	211	225	0.110694	0.128502	0.132197	0.123798	0.0114975
10	175	584	635	0.32833	0.355664	0.37309	0.352362	0.0225621
20	317	979	1092	0.594747	0.596224	0.641598	0.610856	0.0266334
40	425	1208	1362	0.797373	0.735688	0.800235	0.777766	0.0364681
60	483	1360	1546	0.906191	0.828258	0.908343	0.880931	0.0456286
80	512	1438	1683	0.9606	0.875761	0.988837	0.941733	0.0588515
100	533	1642	1702	1	1	1	1	0
time	raw counts			normalised counts			P-thioate oligo
	P-thio 1	P-thio2	P-thio3	P-thio 1	P-thio2	P-thio3	mean	stdev
0	2	19	10	0.00375235	0.0115713	0.00587544	0.00706635	0.00404321
5	17	119	80	0.0318949	0.0724726	0.0470035	0.050457	0.0205081
10	98	463	221	0.183865	0.281973	0.129847	0.198562	0.0771205
20	354	1367	907	0.664165	0.832521	0.532902	0.67653	0.150192
40	964	3259	2176	1.80863	1.98477	1.2785	1.69063	0.367627
60	1573	4499	3258	2.95122	2.73995	1.91422	2.53513	0.548002
80	1956	5285	3895	3.66979	3.21864	2.28848	3.05897	0.70436
100	2548	6165	4722	4.78049	3.75457	2.77438	3.76981	1.00314
