# Supplementary material for: Control of cyclic oligoadenylate synthesis in a type III CRISPR system
Source: eLife. 2018 Jul 2;7:e36734. doi: 10.7554/eLife.36734 (PMC6053304; doi:10.7554/eLife.36734)
Supplement: Figure 9—source data 1. [file elife-36734-fig9-data1.xlsx]

## Sheet: Sheet1
Source data for quantification of product release
Time min	expt1	expt2	expt 3	norm1	norm2	norm3	mean	stdev
0	41	40	44	0.079922	0.0743494	0.106538	0.0869363	0.0172023
2	125	150	135	0.243665	0.27881	0.326877	0.283117	0.0417727
5	224	200	191	0.436647	0.371747	0.46247	0.423621	0.0467429
10	295	299	233	0.575049	0.555762	0.564165	0.564992	0.0096699
20	430	433	297	0.838207	0.804833	0.719128	0.787389	0.0614257
40	513	523	332	1	0.972119	0.803874	0.925331	0.106105
60	496	525	413	0.966862	0.975836	1	0.980899	0.0171395
90	495	538	402	0.964912	1	0.973366	0.979426	0.0183121
120	398	408	360	0.775828	0.758364	0.871671	0.801954	0.0610042
